# Supplementary material for: In silico screening of nanoporous materials for urea removal in hemodialysis applications
Source: Royal Society of Chemistry journal article supplement (doi:10.1039/d3cp01510f), 2023-01-01
Supplement: d3cp01510f1.csv [file d3cp01510f1.csv]

Name	Density (g cm-3)	Channel (�)	Available Surface Area (cm2 g-1)	Chemical Excess Potential Urea (kJ mol-1)	Chemical Excess Potential TIP5P-E (kJ mol-1)	Selectivity (kJ mol-1)
SWNT-3-9	1.68	5.08	2901	-64.73	-12.89	-51.84
graphite-square-channel-8.52A	1.79	5.58	1866	-63.68	-12.68	-51
SWNT-3-11	1.55	6.6	2912	-50.68	-9.02	-41.66
graphite-square-channel-9.94A	1.5	6.94	2072	-44.24	-9.32	-34.92
SWNT-1-14	1.45	7.98	2918	-39.86	-7.19	-32.67
graphite-square-channel-11.36A	1.31	8.31	2181	-36.71	-7.89	-28.82
graphite-square-channel-12.78A	1.19	9.69	2220	-34.18	-7.19	-26.99
SWNT-4-14	1.36	9.42	2916	-33.92	-6.1	-27.82
graphite-square-channel-14.2A	1.05	11.08	2332	-32.51	-6.56	-25.95
graphite-sheet-8.52A	0.89	5.58	2933	-32	-6.37	-25.63
graphite-square-channel-15.62A	0.96	12.48	2388	-31.81	-6.19	-25.62
graphite-square-channel-17.04A	0.89	13.88	2399	-31.6	-5.95	-25.65
graphite-square-channel-18.46A	0.81	15.28	2472	-30.9	-5.6	-25.3
graphite-square-channel-19.88A	0.76	16.68	2505	-30.51	-5.36	-25.15
SWNT-10-11	1.27	10.86	2923	-30.26	-5.6	-24.66
graphite-sheet-9.0A	0.85	6.04	2933	-28.38	-5.68	-22.7
SWNT-10-13	1.2	12.24	2923	-27.9	-5.85	-22.05
SWNT-3-20	1.14	13.56	2920	-26.33	-6.38	-19.95
graphite-sheet-9.5A	0.8	6.52	2933	-24.88	-5.14	-19.74
graphite-sheet-9.94A	0.77	6.94	2933	-22.63	-4.78	-17.85
graphite-sheet-10.25A	0.74	7.24	2933	-21.48	-4.57	-16.91
graphite-sheet-10.65A	0.71	7.62	2933	-20.37	-4.35	-16.02
graphite-sheet-11.0A	0.69	7.96	2933	-19.65	-4.19	-15.46
graphite-sheet-11.36A	0.67	8.31	2933	-19.08	-4.04	-15.04
graphite-sheet-12.0A	0.63	8.93	2933	-18.34	-3.84	-14.5
graphite-sheet-12.78A	0.6	9.69	2933	-17.75	-3.63	-14.12
graphite-sheet-13.25A	0.57	10.15	2933	-17.49	-3.53	-13.96
graphite-sheet-13.75A	0.55	10.64	2933	-17.28	-3.44	-13.84
graphite-sheet-14.2A	0.54	11.08	2933	-17.12	-3.37	-13.75
graphite-sheet-15.0A	0.51	11.87	2933	-16.9	-3.25	-13.65
graphite-sheet-15.62A	0.49	12.48	2933	-16.77	-3.17	-13.6
graphite-sheet-17.04A	0.45	13.88	2930	-16.48	-3	-13.48
graphite-sheet-18.46A	0.41	15.28	2929	-16.28	-2.86	-13.42
graphite-sheet-19.88A	0.38	16.68	2929	-16.08	-2.73	-13.35
