# Supplementary material for: In silico screening of nanoporous materials for urea removal in hemodialysis applications
Source: Royal Society of Chemistry journal article supplement (doi:10.1039/d3cp01510f), 2023-01-01
Supplement: d3cp01510f2.csv [file d3cp01510f2.csv]

Name	Density (g cm-3)	Channel (�)	Available Surface Area (cm2 g-1)	Chemical Excess Potential Urea (kJ mol-1)	Chemical Excess Potential TIP5P-E (kJ mol-1)	Selectivity (kJ mol-1)
COF-F6	1.09	10.56	4568	-84.18	-35.43	-48.75
CF3-TFP-TTA	0.59	19.01	5102	-49.01	-25.61	-23.4
CF3-TFP-TAPB	0.52	19.36	5217	-46.96	-22.38	-24.58
TpPa-F4	1.02	14.9	3979	-44.69	-18.13	-26.56
EB-COF-F	0.82	10.55	5443	-41.96	-21.74	-20.22
COF-F	0.56	26.94	4851	-41.12	-18.57	-22.55
NUS-3	0.69	16.66	5090	-37.07	-12.02	-25.05
DAPH-TFP	0.54	23.46	5290	-33.45	-15.35	-18.1
NPN-1	1.05	4.11	4772	-31.53	-5.89	-25.64
PP-TzDa-AB	0.7	7.34	5932	-30.32	-5.91	-24.41
EB-COF-Cl	0.85	10.55	5387	-29.36	-11.03	-18.33
COF-318	1.14	13.04	2184	-29.04	-7.83	-21.21
COF-316	1.14	13.05	3091	-28.08	-7.82	-20.26
TFPA-TGCl-iCOF-3	0.94	8.37	5140	-27.94	-7.64	-20.3
CCOF-6	0.89	5.65	5177	-27.87	-4.96	-22.91
Tf-DHzDPr-COF	0.74	15.83	5651	-27.8	-9.32	-18.48
TpPA-NO2	0.96	11.45	4207	-27.54	-8.51	-19.03
DaTp-COF	1.11	21.89	1595	-27.15	-11.02	-16.13
PC-COF	0.28	41.12	6049	-27.14	-8.54	-18.6
POR-COF	0.5	14.05	5265	-26.98	-4.08	-22.9
NUS-10	0.73	12.97	4604	-26.66	-5.86	-20.8
TThPP	0.39	16.66	5255	-26.44	-3.17	-23.27
Py-1P_F-COF	0.65	16.4	5244	-26.1	-11.56	-14.54
CCOF-MPC	0.87	5.44	6040	-25.98	-3.47	-22.51
HO2C-H2P-COFs	0.42	10.89	5659	-25.7	-3.62	-22.08
CC-TAPH-COF	0.49	9.35	5713	-25.52	-4.07	-21.45
HCC-H2P-COF	0.39	15.67	5730	-25.43	-3.11	-22.32
DhaTph-25	0.35	18.47	5683	-25.38	-2.97	-22.41
DmaTph-23	0.38	17.59	5782	-25.3	-2.97	-22.33
OH-H2P-COF	0.35	18.55	5687	-25.29	-2.99	-22.3
H2P-COF	0.33	20.26	5854	-25.21	-2.63	-22.58
TpPa-SO3H	0.94	12.51	4356	-25.21	-5.61	-19.6
COF-366	0.36	20.45	5662	-25.11	-2.44	-22.67
NN-TAPH-COF	0.49	9.32	5671	-25.02	-3.79	-21.23
CPF-2	0.3	21.58	5486	-25	-3.98	-21.02
Por-COF-jmca	0.36	20.45	5671	-25	-2.4	-22.6
Tf-DHzDAll-COF-1	0.64	17.27	6059	-24.86	-6.6	-18.26
CPF-1	0.29	23.07	5598	-24.73	-3.15	-21.58
PI-COF-2-unflat	0.49	23.53	4714	-24.38	-4.37	-20.01
GS-COF-2-AB	0.98	4.48	4965	-24.19	-4.85	-19.34
GS-COF-1-AB	1	4.12	4950	-23.95	-4.44	-19.51
NPN-3	1.05	5.44	5001	-23.93	-3.68	-20.25
PI-COF-1-unflat	0.54	19.42	4734	-23.81	-4.35	-19.46
DMTA-TPB4	1.05	5.57	5089	-23.49	-4.04	-19.45
PyTTA-BFBIm-iCOF	0.87	14.93	3216	-23.46	-3.41	-20.05
OH-TAPH-COF	0.34	18.54	5801	-23.35	-2.8	-20.55
DhaTph-23	0.35	19.25	5704	-23.21	-2.98	-20.23
EB-COF-Br	0.93	10.55	4935	-23.08	-7.32	-15.76
Tf-DHzDM-COF-1	0.54	20.84	5813	-22.96	-4.65	-18.31
MOF-70	1.69	4.99	2479	-22.96	-3.44	-19.52
COF-JLU4	0.62	21.55	5228	-22.93	-5.25	-17.68
COF-42	0.56	17.19	5602	-22.87	-5.76	-17.11
BBO-COF	0.94	11.54	4996	-22.31	-5.94	-16.37
COF-JLU3	0.44	12.08	6434	-22.3	-4.37	-17.93
COF-AO	0.6	18.34	6201	-22.17	-5.46	-16.71
CTF-2-AB	0.9	4.89	5290	-22.17	-4.7	-17.47
3D-COOH-COF	0.93	4.93	5781	-21.96	-5.04	-16.92
TpPa-SO3H-Py	0.77	16.32	4780	-21.87	-4.43	-17.44
CTF-fuma	1.03	6.74	5231	-21.7	-2.5	-19.2
TPE-COF-III	0.59	16.28	6056	-21.55	-2.48	-19.07
Py-1P-COF-AB	0.5	9.57	5493	-21.43	-3.13	-18.3
TAPT-BTCA-COF-AB	0.74	5.58	5656	-21.32	-3.87	-17.45
N-COF	0.73	3.67	5808	-21.21	-3.79	-17.42
Py-DHPh_COF	0.31	20.24	5394	-21.15	-1.98	-19.17
TpOMe-DAQ	1.29	20.86	1457	-21.01	-10.94	-10.07
TpPA-2	0.78	13.77	5427	-20.96	-4.97	-15.99
TPE-COF-II	0.65	11.69	5869	-20.86	-3.78	-17.08
Py-pTII	0.53	19.12	5583	-20.7	-2.68	-18.02
Cd3BTB2	0.97	6.57	4093	-20.69	-5.8	-14.89
COF-300_dia-c7	1.04	4.51	5695	-20.68	-2.24	-18.44
TpOMe-BD_NO2-2	1.33	20.95	1275	-20.55	-10.77	-9.78
LZU-301-activated	0.99	4.66	5775	-20.54	-2.16	-18.38
PP-TzDa-AA	0.73	13.14	5903	-20.44	-2.73	-17.71
Py-23-DHPh_COF	0.31	21.46	5457	-20.4	-2.34	-18.06
TAPB-TIDA-COF	0.48	27.73	5527	-20.22	-3.42	-16.8
NS-COF	0.59	6.69	5408	-20.17	-4.36	-15.81
TTF-TA-COF-AB	1.09	4.22	5403	-20.16	-1.84	-18.32
PI-COF-5	0.51	11.2	4892	-20.12	-3.88	-16.24
LZU-192	0.74	16.95	4090	-19.97	-3.44	-16.53
Tf-DHzDM-COF	0.62	19.83	5483	-19.87	-5.71	-14.16
CCOF-5	0.83	5.61	5330	-19.72	-2.84	-16.88
SIOC-COF-5	0.91	6.89	5423	-19.68	-1.64	-18.04
Tf-DHzOAll-COF-A	0.64	17.27	6059	-19.46	-6.63	-12.83
Tf-DHzDAll-COF-2	0.68	19.01	6014	-19.32	0.33	-19.65
DABQ-TFP-COF	0.79	15.16	4977	-19.26	-3.61	-15.65
3D-TPE-COF	0.95	5.97	6104	-19.13	-1.31	-17.82
COF-BABD-BZ	0.46	12.53	5249	-19.13	-2.8	-16.33
NUS-50	0.55	22.78	5080	-19.09	-3.31	-15.78
Intercalated-COF-5	0.77	8.03	6030	-19.05	-2.6	-16.45
Py-4T_TPD-COF	0.5	24.29	5440	-19.02	-2.85	-16.17
VO-TAPT-23-DHTA-COF	0.92	24.92	1771	-18.98	-24.23	5.25
NUS-9	0.6	12.04	4927	-18.93	-4.25	-14.68
OH-TFP-TTA	0.64	18.45	5027	-18.91	-3.87	-15.04
IMDEA-2	0.66	18.5	5112	-18.88	-3.64	-15.24
DPP-TAPP-COF	0.7	18.59	5315	-18.84	-1.4	-17.44
BBO-COF-1	0.9	13.02	4474	-18.79	-3.14	-15.65
TAPBB-COF-2	0.49	9.95	4359	-18.78	-5.64	-13.14
DPP-TFP	0.72	17.54	4613	-18.65	-5.33	-13.32
3D-HNU5-5	0.77	5.88	5801	-18.52	-2	-16.52
TPE-COF-I	0.76	7.82	5431	-18.47	-2.81	-15.66
JUC-561-1	0.38	23.33	4818	-18.43	-2.27	-16.16
TpOMe-BPy	1.15	21.4	1724	-18.31	-3.31	-15
3D-IL-COF-1	0.5	7.54	6483	-18.21	-2.22	-15.99
NUS-51	0.55	22.68	5059	-18.06	-3.12	-14.94
COF-TpDb	0.73	13	5429	-18.02	-3.88	-14.14
TpOMe-Pa1	1.46	13.21	1913	-18	-2.1	-15.9
COF-300-SC-hydrated_dia-c7	1.12	4.26	5546	-17.95	-2.93	-15.02
CCOF-TpBD-Me2	0.6	21.9	5460	-17.94	-3.86	-14.08
COF-BABD-DB	0.54	11.59	5722	-17.79	-2.31	-15.48
DhaTab-23	0.43	29.31	5670	-17.77	-3.94	-13.83
COF-119-1	0.54	24.58	5345	-17.72	-2.58	-15.14
CCOF-TpTab	0.83	11.4	5264	-17.68	-3.85	-13.83
PI-COF-2	0.55	20.86	4833	-17.5	-3.6	-13.9
SP-3D-COF-2	0.47	16.68	4910	-17.48	-2.83	-14.65
COF-300-SC_dia-c7	0.74	8.98	5508	-17.39	-2.71	-14.68
TPB-DBBA-COF-AB	0.56	12.44	4556	-17.33	-5.73	-11.6
2D-BPTA-COF	0.83	8.25	5853	-17.32	-2.01	-15.31
COF-921	0.73	17.63	4115	-17.32	-2.17	-15.15
SIOC-COF-4	0.56	7.3	5899	-17.2	-2.2	-15
BITA-PDA-COF-AB	0.54	10.16	5776	-17.18	-3.03	-14.15
TAPB-OMeTA-COF-AB	0.46	13.58	5656	-17.18	-3.05	-14.13
TPT-DMBD-COF	0.31	36.81	5507	-16.94	-2.32	-14.62
TAPB-TFPA-COF	0.57	17.83	5643	-16.77	-1.02	-15.75
Car-ETTA-COF	0.84	8.46	5329	-16.76	-1.81	-14.95
3D-BMTA-COF	0.83	9.97	5502	-16.68	-1.79	-14.89
ETTF-DABP-COF-1	0.46	31.9	4819	-16.57	-1.73	-14.84
COF-119-2	0.49	24.82	5516	-16.54	-2.59	-13.95
SIOC-COF-3	0.66	7.27	5865	-16.39	-1.77	-14.62
IISERP-CON1	0.79	9.8	5698	-16.38	-2.14	-14.24
COF-TpAzo	0.5	26.05	4940	-16.35	-4.36	-11.99
LZU-190	0.8	13.99	4777	-16.35	-2.52	-13.83
3D-HNU5-3	0.46	6.33	5801	-16.34	-2.99	-13.35
3D-OH-COF	0.77	7.06	5752	-16.28	-2.41	-13.87
TPE-COF-IV	0.51	15.92	6108	-16.18	-2.23	-13.95
BF-COF-2	0.47	13.28	4865	-16.07	-3.07	-13
PI-COF	0.46	21.68	4840	-16.07	-2.7	-13.37
LZU-79	0.59	13.61	5251	-16.05	-2.31	-13.74
HAT-NTBA-COF	0.93	7.88	5193	-15.97	-1.37	-14.6
3D-HNU5-4	0.62	7.68	5818	-15.88	-2.67	-13.21
COF-HQ	0.78	17.18	5759	-15.83	-1.36	-14.47
TPAPC-COF	0.36	20.35	5846	-15.69	-1.74	-13.95
COF-3PD	0.51	23.37	5709	-15.68	-3.48	-12.2
TPHH-COF-AB	0.69	8.52	5253	-15.67	-2.76	-12.91
sp2c-COF-5	0.5	33.14	4436	-15.66	-2.23	-13.43
JUC-560-2	0.52	13.44	5494	-15.65	-2.87	-12.78
COF-BTA-DHBZ	0.75	21.39	5318	-15.64	-2.79	-12.85
PI-COF-4-2P	0.56	8.2	4551	-15.53	-3.53	-12
1-22n-COF	0.97	6	6083	-15.44	-1.01	-14.43
TAPB-TA-COF-AB	0.38	16.86	5904	-15.35	-2.51	-12.84
TpOMe-Azo	0.97	25.83	1829	-15.23	-2.12	-13.11
COF-43	0.35	32.5	6000	-15.18	-3.24	-11.94
CCOF-1	0.53	9.6	5949	-15.12	-2.47	-12.65
COF-3BD	0.41	31	5786	-15.1	-2.92	-12.18
COF-300_dia-c5	0.55	9.36	5391	-15.1	-2.62	-12.48
COF-TpAab	0.47	26.54	5608	-15.07	-3.08	-11.99
PI-COF-SR	0.52	29.3	4992	-15.03	-2.54	-12.49
COF-LZU8	0.76	13.53	6096	-15.01	-7.69	-7.32
TP-COF-AB	0.45	11.53	5707	-14.99	-2.82	-12.17
Py-pII	0.48	21.18	5842	-14.96	-1.68	-13.28
ATFG-COF	0.89	10.37	4729	-14.92	-3.5	-11.42
DAAQ-TFP-COF	0.61	22.26	4735	-14.92	-3.23	-11.69
BF-COF-1	0.4	13.26	5433	-14.88	-2.18	-12.7
TDFP-1	0.53	13.09	5727	-14.73	-2.43	-12.3
C4-SHz-COF	0.58	16.07	5443	-14.59	-1.42	-13.17
CCOF-TpBD	0.53	23.68	5495	-14.57	-2.97	-11.6
ILCOF-1-AA	0.32	21.2	5788	-14.56	-2.16	-12.4
PPPP-1	0.55	27.09	4921	-14.52	-2.51	-12.01
PP-TzDa	0.65	16.93	5926	-14.51	-1.52	-12.99
Py-TPE-COF	0.75	11.83	5129	-14.51	-1.82	-12.69
CTF-1	1.02	8.41	5181	-14.5	-1.08	-13.42
SIOC-COF-6	0.68	12.54	5531	-14.47	-1.45	-13.02
TpOMe-Tab	0.96	10.5	4449	-14.45	-1.13	-13.32
NUS-2	0.91	9.9	4863	-14.44	-2.79	-11.65
COF-JLU2	0.91	10.37	4863	-14.43	-2.79	-11.64
PyTA-BC	0.95	10.63	5071	-14.43	-1.5	-12.93
OMe-OH-TPBP-COF	0.77	8.97	5421	-14.4	-1.47	-12.93
ILCOF-1	0.32	21.2	5788	-14.39	-2.15	-12.24
COF-m-3Ph	0.78	11.16	5664	-14.35	-1.91	-12.44
Py-BSZ-COF	0.51	23.6	5552	-14.34	-1.4	-12.94
HPB-COF	0.68	7.57	5686	-14.32	-1.56	-12.76
BDT-ETTA-COF	0.49	31.68	5005	-14.27	-1.29	-12.98
sp2c-COF-5-2	0.47	33.88	4758	-14.19	-1.95	-12.24
Py-4T_TT-COF	0.57	23.47	5158	-14.12	-1.64	-12.48
DAB-TFP_COF	0.71	16.14	5282	-14.06	-3.38	-10.68
TD-COF	0.43	27.26	5837	-14.04	-0.59	-13.45
CCOF-TpPa-1	0.72	14.8	5325	-13.98	-3.23	-10.75
JUC-511-1	0.51	26.37	5059	-13.93	-2.59	-11.34
COF-300	0.55	9.36	5392	-13.92	-2.61	-11.31
PI-COF-1	0.64	17.69	4747	-13.89	-3.58	-10.31
Py-a4T-COF	0.54	23.05	5655	-13.82	-1.07	-12.75
APT-DHTA-COF-AB	0.5	12.34	5447	-13.8	-2.76	-11.04
4PE-TT	0.53	27.58	5041	-13.77	-1.28	-12.49
SIOC-COF-7	0.82	9.8	5392	-13.71	-0.57	-13.14
COF-QA-AA	0.34	17.69	6648	-13.62	-2	-11.62
MOF-72	1.81	3.95	3558	-13.61	-2.05	-11.56
NTU-BDA-THTA	0.69	16.16	5282	-13.58	-3.25	-10.33
COF-120-1	0.43	27.69	5610	-13.54	-1.88	-11.66
ETTF-DABP-COF-2	0.4	33.03	5532	-13.54	-1.29	-12.25
COF-AA-H	0.51	25.69	5134	-13.53	-1.44	-12.09
Py-DHPh-COF	0.51	18.85	5472	-13.46	-2.56	-10.9
EDTFP-1	0.39	27.41	5762	-13.38	-2.62	-10.76
COF-TpTU	0.54	19.18	5634	-13.37	-2.35	-11.02
Tb-DANT-COF	0.68	21.16	4867	-13.34	-3.02	-10.32
OH-TPBP-COF	0.69	10.39	5505	-13.3	-1.35	-11.95
COF-Tirf-Benz	0.28	37.66	5792	-13.2	-1.23	-11.97
COF-TpU	0.44	27.21	5553	-13.16	-2.02	-11.14
Py-a4T_Me-COF	0.51	25.72	5266	-13.15	-1.11	-12.04
PPPP-2	0.57	26.01	4848	-13.1	-1.97	-11.13
Py-Azine-COF	0.68	14.86	5488	-13.07	-0.95	-12.12
PCTF-4	0.58	17.89	5122	-13.05	-1.21	-11.84
TpPa-OH2	0.83	12.71	5069	-13.04	-4.93	-8.11
sp2c-COF	0.65	16.55	5614	-12.97	-2.19	-10.78
TH-COF-1	0.81	10.92	5008	-12.93	-2.76	-10.17
Brick-wall-COF	0.54	16.08	5707	-12.86	-1.39	-11.47
TPB-BMTP-COF	0.57	15.47	6117	-12.8	-2.33	-10.47
COF-120-2	0.41	30.71	5582	-12.77	-1.71	-11.06
COF-FADA-DAB	0.55	24.15	5767	-12.67	-0.97	-11.7
COF-120-3	0.39	29.67	5629	-12.65	-1.73	-10.92
HAT-COF	0.75	9.88	5475	-12.62	-1.01	-11.61
sp2c-COF-1	0.61	17.24	5465	-12.59	-2.22	-10.37
ILCOF-1b	0.69	16.52	5064	-12.57	-1.19	-11.38
4PE-1P-COF-oxidation	0.45	25.03	5716	-12.55	-1.76	-10.79
TpFn	0.65	21.05	4265	-12.52	-5.28	-7.24
B-COF-1	0.59	21.28	5723	-12.49	-0.95	-11.54
TPA-TPP-COF	0.65	16.11	4761	-12.47	-1.73	-10.74
TTF-Py-COF	0.77	13.31	5259	-12.46	-1.33	-11.13
PI-3-COF	0.77	11.19	5358	-12.45	-1.35	-11.1
TFPPy-DETHz-COF	0.54	17.16	4740	-12.45	-3.17	-9.28
3D-Por-COF	0.31	16.29	5598	-12.43	-1.69	-10.74
TPE-TAP-COF	0.8	11.08	4988	-12.39	-1.33	-11.06
COF-121-1	0.35	34.56	5738	-12.32	-1.63	-10.69
HBC-COF	0.81	11.02	5275	-12.22	-0.83	-11.39
TTF-DMTA-COF	0.76	11.32	5479	-12.2	-1.16	-11.04
TTF-COF	0.61	22.06	5301	-12.14	-0.85	-11.29
TTF-Ph-COF	0.64	16.09	5316	-12.07	-1.14	-10.93
LZU-76	0.39	22.31	5795	-12.05	-1.58	-10.47
4PE-1P	0.52	24.32	5478	-12.02	-0.96	-11.06
3D-HNU5-non	0.32	14.32	4091	-11.99	-2.17	-9.82
TPA-COF-3	0.66	15.76	4863	-11.98	-1.56	-10.42
JUC-552-3-fold	0.36	9.76	5797	-11.97	-2.24	-9.73
TJNU-202	0.54	20.07	4937	-11.94	-2.16	-9.78
TpBpy-cis-COF	0.65	20.89	4644	-11.94	-4.09	-7.85
COF-121-2	0.35	37.62	5651	-11.88	-1.49	-10.39
BBO-COF-2	0.48	28.87	5194	-11.85	-1.86	-9.99
OMe-TPBP-COF	0.71	9.86	5615	-11.82	-1.04	-10.78
COF-BPDA	0.43	32.11	5678	-11.79	-0.97	-10.82
AB-COF	0.68	11.56	6077	-11.74	-1.8	-9.94
ACOF-1	0.68	11.56	6077	-11.73	-1.79	-9.94
BND-TFB	0.58	22.78	3828	-11.69	-1.12	-10.57
BTT-TAB-CO	0.75	14.87	4956	-11.69	-1.25	-10.44
Py-1P-COF	0.59	17.25	5452	-11.68	-1.05	-10.63
TTF-TA-COF-AA	0.53	17.09	5337	-11.66	-1.19	-10.47
COF-ETTA-ETTCA-AA	0.51	14.87	6058	-11.65	-0.99	-10.66
TpPa-Py	0.72	14.95	5198	-11.65	-2.89	-8.76
COF-121-3	0.32	36.62	5739	-11.63	-1.49	-10.14
PyTA-BC-Ph-COF	0.72	12.68	4897	-11.63	-1	-10.63
TfpBDH	0.63	9.11	5355	-11.63	-1.59	-10.04
Tp-Azo	0.56	25.67	4513	-11.57	-10.3	-1.27
TPE-COF-OH	0.5	27.76	5620	-11.57	-2.3	-9.27
BITA-PDA-COF-AA	0.51	31.5	5849	-11.52	-0.8	-10.72
COF-BTA-PDA	0.52	17.12	6486	-11.5	-1.26	-10.24
HBC-COF-real	0.81	10.81	5361	-11.49	-0.8	-10.69
T-COF-2	0.59	21.37	5205	-11.42	-0.68	-10.74
TPE-COF-OMe	0.65	9.07	5940	-11.29	-1.24	-10.05
TpTe-1-COF-AB	0.45	10.31	6136	-11.22	-3.44	-7.78
BTT-DADP-COF	0.48	29.53	5004	-11.21	-1.09	-10.12
15C5-COF	0.49	16.86	5912	-11.2	-0.85	-10.35
BTT-DAB-COF	0.59	22.53	4873	-11.19	-1.14	-10.05
B-COF-2	0.57	21.84	5285	-11.17	-0.74	-10.43
TFPB-DHzDS-COF	0.57	22.78	5398	-11.13	-5.09	-6.04
JUC-551-3-fold	0.34	10.65	5720	-11.12	-2.06	-9.06
TpBD-OH2	0.59	20.97	5327	-11.1	-4.6	-6.5
SIOC-COF-1	0.46	28.53	5730	-11.08	-0.79	-10.29
TFPB-DHzDAll-COF	0.5	28.48	5050	-11.07	-0.92	-10.15
TFP-NDA-COF	0.87	13.59	5006	-11.05	-3.79	-7.26
COF-K	1	9.07	5573	-11.04	0.49	-11.53
COF-TPDA	0.37	38.87	5728	-11	-0.83	-10.17
18C6-COF	0.57	13.64	5980	-10.99	-0.73	-10.26
BTT-TAPT-COF	0.7	15.74	5145	-10.99	-1.09	-9.9
HP-COF-1	0.63	14.79	5934	-10.98	-1.16	-9.82
Py-An-COF	0.51	20.62	5389	-10.97	-0.95	-10.02
TFPB-TGCl-iCOF-2	0.85	10.81	5260	-10.95	-6.62	-4.33
P-DpTaDm-COF-12	0.52	25.57	5485	-10.94	-0.59	-10.35
DhaTab-25	0.42	29.62	5837	-10.86	-1.52	-9.34
TPT-COF-1	0.65	19.7	5382	-10.79	-1.14	-9.65
T-COF	0.74	11.62	5623	-10.78	-0.76	-10.02
HP-COF-2	0.53	17.15	6076	-10.77	-1.01	-9.76
Thio-COF	0.48	22.19	5918	-10.77	-2.99	-7.78
FL-COF-1	0.55	19.5	5671	-10.76	-0.9	-9.86
JUC-550-3-fold	0.33	10.44	5642	-10.74	-1.92	-8.82
Tp-DANT-COF	0.73	21.61	4596	-10.74	-3.31	-7.43
COF-ASB	0.41	25.46	5989	-10.73	-2.06	-8.67
COF-Me-AA	0.32	35.71	5937	-10.71	-1.36	-9.35
CorMeO-COF	0.45	21.48	5327	-10.67	-0.79	-9.88
ILCOF-1-AB	0.34	11.09	5772	-10.67	-1.88	-8.79
4PE-2P	0.44	32.33	5620	-10.64	-0.82	-9.82
iPrTAPB-TFP	0.98	7.45	5365	-10.58	0.81	-11.39
TPA-TPA-COF	0.57	15.2	5546	-10.56	-1.33	-9.23
LZU-191	0.5	28.06	4890	-10.52	-1.47	-9.05
TFPT-COF	0.49	28.58	5379	-10.5	-4.06	-6.44
TTF-DMTA-1-COF	0.6	17.25	5387	-10.5	-1.66	-8.84
TFPB-DHzDPr-COF	0.48	28.37	5382	-10.49	-5.37	-5.12
TFPA-TAPA-COF	0.6	15.42	5636	-10.48	-1.16	-9.32
TS-COF-2	0.8	11.31	5289	-10.47	-3.69	-6.78
TPA-COF	0.63	15.41	5504	-10.42	-1.08	-9.34
TFPT-TGCl-iCOF-1	0.86	10.75	5248	-10.39	-6.06	-4.33
TpBD-OMe2-Solvothermal	0.72	21.78	4300	-10.38	-2.31	-8.07
TPT-DHBD-COF	0.42	32.46	5456	-10.37	-3.53	-6.84
MF-2a	0.8	13.7	5425	-10.36	-0.22	-10.14
TAPT-BMTA-COF-AA	0.55	23.78	5366	-10.32	-0.75	-9.57
TRIPTA	0.79	12.37	5273	-10.3	-3.62	-6.68
TpOMe-PaNO2	1.01	13.33	3974	-10.29	-4.58	-5.71
LZU-301-solvated	0.73	8.33	5913	-10.28	-0.53	-9.75
PCTF-1	0.63	13.75	5550	-10.27	-0.84	-9.43
COF-320-298K	0.7	8.45	5882	-10.23	-0.65	-9.58
DhaTab	0.4	32.28	6001	-10.16	-1.74	-8.42
DMTA-TPB2	0.62	20.95	5480	-10.13	-0.61	-9.52
T-COF-1	0.61	21.11	5623	-10.13	-0.8	-9.33
TPB-DMeTP-COF-1	0.42	28.37	5606	-10.13	-1.09	-9.04
TpBD	0.59	22.65	4651	-10.12	-3.76	-6.36
JUC-560-1	0.46	26.95	5527	-10.1	-0.59	-9.51
SIOC-COF-2	0.39	35.25	5782	-10.1	-0.61	-9.49
TAPB-TFPB	0.54	19.29	5938	-10.09	-0.38	-9.71
Py-2PE-COF	0.44	24.1	5732	-10.05	-0.63	-9.42
TD-COF-AA	0.59	22.85	4723	-10.04	-2.21	-7.83
COF-Naph	0.73	11.69	5699	-10.03	-0.84	-9.19
P-COF	0.7	11.82	5709	-10.03	-0.76	-9.27
TAPT-DHTA-COF	0.44	29.76	5606	-10.03	-1.72	-8.31
COF-O	0.3	25.25	5775	-9.94	-1.05	-8.89
COF-NHC	0.89	17.4	4942	-9.92	0.24	-10.16
PI-COF-4	0.28	17.5	4567	-9.92	-1.72	-8.2
BCzP-COF	0.66	14.12	5542	-9.89	-0.74	-9.15
APT-DHTA-COF-AA	0.43	29.86	5628	-9.86	-1.68	-8.18
Tp-Ttba	0.66	17.39	5262	-9.86	-3.32	-6.54
TJNU-201	0.53	16.69	5592	-9.85	-1.26	-8.59
TFPA-TAPB-COF	0.56	17.19	5674	-9.81	-0.99	-8.82
4PE-3P	0.36	39.21	5850	-9.8	-0.64	-9.16
Py-3PE-COF	0.41	27.16	5857	-9.78	-0.67	-9.11
DMTA-TPB3	0.63	19.35	5457	-9.76	-0.53	-9.23
N2-COF	0.49	23.41	5780	-9.71	-0.8	-8.91
TAPB-BMTTPA-COF	0.47	25.08	5692	-9.71	-0.65	-9.06
COF-C	0.33	24.87	5623	-9.68	-0.97	-8.71
IISERP-COF3	0.22	22.16	4787	-9.68	-1.92	-7.76
PR100-COF	0.38	26.12	4885	-9.67	-0.88	-8.79
3D-IL-COF-2	0.72	7.86	6232	-9.66	0.01	-9.67
TPT-COF-4	0.58	17.2	5454	-9.65	-0.97	-8.68
TpPa-1	0.71	16.14	5262	-9.61	-3.38	-6.23
TFPB-THz-COF	0.64	15.1	5606	-9.6	-5.11	-4.49
COF-p-2Ph	0.53	24.06	5841	-9.56	-1.1	-8.46
BCTB-BCTA-COF	0.62	15.79	5576	-9.55	-0.61	-8.94
BCCTP-COF	0.64	16.89	5701	-9.54	-0.7	-8.84
TpPa-1-2F	0.83	15.58	4769	-9.5	-10.97	1.47
A2B2-Por-COF	0.57	18.53	5520	-9.46	-0.52	-8.94
3D-Py-COF-2P	0.28	13.47	5618	-9.43	-1.62	-7.81
3D-Py-COF	0.28	13.47	5618	-9.42	-1.62	-7.8
TFPT-BTAN	0.81	10.74	5618	-9.4	-2.11	-7.29
LZU-72	0.46	20.9	5920	-9.39	-0.67	-8.72
TPT-COF-2	0.46	28.93	5573	-9.39	-0.88	-8.51
TP-COF	0.69	16.16	5282	-9.29	-3.24	-6.05
DP-COF-ED	0.38	39.93	5787	-9.23	-0.6	-8.63
TPT-Azine-COF	0.48	22.41	5425	-9.18	-3.04	-6.14
TpBDH	0.71	20.89	4536	-9.15	-2.07	-7.08
12C4-COF	0.46	19.72	5800	-9.13	-0.63	-8.5
COF-p-3Ph	0.42	32.23	5902	-9.11	-0.98	-8.13
PCTF-2	0.48	21.5	5625	-9.1	-0.78	-8.32
TzDa	0.47	29.06	5081	-9.03	-3.21	-5.82
BCTB-PD-COF	0.48	22.82	5731	-9	-0.67	-8.33
COF-122-1	0.26	55.5	5856	-8.99	-1.18	-7.81
TPT-COF-5	0.58	18.37	5538	-8.97	-0.76	-8.21
TfBD	0.46	23.76	5924	-8.95	-0.69	-8.26
TPT-BD-COF	0.39	34.77	5477	-8.93	-3.21	-5.72
COF-V	0.43	25.97	6017	-8.89	-0.53	-8.36
TFPB-TAPB-COF	0.54	19.6	5812	-8.89	-0.78	-8.11
TPB-DMTP-COF	0.46	26.56	5845	-8.88	-0.99	-7.89
TpBpy-COF	0.56	22.62	5222	-8.83	-2.72	-6.11
3D-HNU5-2	0.31	11.5	5801	-8.82	-1.57	-7.25
PCTF-3	0.4	27.84	5830	-8.75	-0.65	-8.1
MF-1a	0.64	23.46	5658	-8.63	0.16	-8.79
3D-IL-COF-3	0.67	10	6237	-8.59	0.03	-8.62
GS-COF-1-AA	0.91	12.14	4996	-8.59	-0.74	-7.85
TPA-COF-2	0.56	16.67	5684	-8.56	-0.65	-7.91
P-StPtDm-COF-6	0.64	23.57	5619	-8.51	0.18	-8.69
TBI-COF	0.54	19.04	5842	-8.49	-0.59	-7.9
JUC-527	0.42	25.64	5626	-8.46	-0.7	-7.76
JUC-551-2-fold	0.23	12	5711	-8.46	-1.39	-7.07
LZU-70	0.43	26.14	5775	-8.42	-0.58	-7.84
TAT-COF-2	0.69	15.44	5746	-8.34	-0.16	-8.18
COF-122-2	0.23	60.78	5818	-8.31	-0.87	-7.44
TPT-COF-6	0.59	18.52	5505	-8.31	-0.61	-7.7
TP-COF-AA	0.45	29.72	5600	-8.2	-1.25	-6.95
iPrTAPB-TFPB	0.61	15.85	5801	-8.16	0.15	-8.31
TFPB-DHzDM-COF	0.41	34.75	5168	-8.11	-4.02	-4.09
TP-BDDA-COF	0.35	33.17	5688	-8.11	-2.28	-5.83
P-StTtDm-COF-10	0.66	23.47	5569	-8.08	0.23	-8.31
P-StPtTp-COF-8	0.58	23.46	5605	-8.06	-0.08	-7.98
TPBD-Me2	0.53	25.54	5116	-8.06	-3.01	-5.05
JUC-530	0.95	9.6	6078	-8.03	0.86	-8.89
P-StTaDm-COF-2	0.64	23.65	5713	-8.02	0.25	-8.27
TP-EDDA-COF	0.42	28.48	5607	-8.02	-2.72	-5.3
JUC-550-2-fold	0.22	12.48	5674	-7.98	-1.27	-6.71
TTI-COF	0.57	18.52	5624	-7.96	-0.53	-7.43
COF-TVBT-PA-AA	0.31	39.11	6151	-7.92	-0.51	-7.41
TpTD	0.41	31.61	5569	-7.92	-2.91	-5.01
COF-2	0.18	27.14	5927	-7.76	-0.82	-6.94
TAPB-TFP	0.77	11.99	5407	-7.65	-4.16	-3.49
TPB-TP-COF-oxidation	0.39	30.07	5701	-7.63	-1.72	-5.91
DhaTta-23	0.43	29.25	5602	-7.6	-0.65	-6.95
JNU-1	0.34	35.72	6671	-7.47	-0.82	-6.65
TPT-DAHQ-COF	0.47	28.65	5200	-7.45	-1.44	-6.01
TS-COF-1	0.51	29.8	5073	-7.44	-2.37	-5.07
TP-COF-DAB	0.58	28.03	5876	-7.42	-0.34	-7.08
JUC-564	0.11	47.74	5605	-7.25	-0.66	-6.59
TpPa-OMe2	0.9	10.47	5450	-7.11	-6	-1.11
NUS-15	0.39	31.45	6019	-7.1	-0.41	-6.69
JUC-528	0.33	33.02	5575	-7.06	-0.45	-6.61
TPB-DBBA-COF-AA	0.39	31.51	5859	-7.02	-0.5	-6.52
3D-Py-COF-0P	0.14	24.44	5630	-6.99	-0.88	-6.11
COF-1-2	0.3	37.74	6103	-6.96	-0.45	-6.51
JUC-552-non	0.11	28.52	5710	-6.86	-0.83	-6.03
TzBA	0.34	36.03	5408	-6.75	-0.56	-6.19
TAPB-PDA-COF	0.37	30.97	5908	-6.71	-0.4	-6.31
TAPB-BPDA-COF	0.33	38.2	5882	-6.55	-0.39	-6.16
TPB-TP-COF	0.33	29.8	5523	-6.53	-0.52	-6.01
COFs	0.33	38.03	5902	-6.41	-0.35	-6.06
Tf-DHzDAll-COF	0.74	16.34	5512	-6.24	-8.7	2.46
Tf-DHzOAll-COF-E	0.68	18.98	6009	-6.24	0.33	-6.57
JUC-551-non	0.1	28.27	6009	-5.99	-0.66	-5.33
TP-COF-BZ	0.44	36.56	5893	-5.99	-0.37	-5.62
TAT-COF-1	0.46	28.41	5826	-5.62	-0.2	-5.42
JUC-550-non	0.1	29.01	5933	-5.6	-0.59	-5.01
TpTe-1-COF	0.45	25.99	6102	-5.53	-2.6	-2.93
CCOF-2	0.12	22.89	6055	-5.52	-0.67	-4.85
JUC-561-3	0.13	27.24	5756	-5.36	-0.58	-4.78
