# Supplementary material for: In silico screening of nanoporous materials for urea removal in hemodialysis applications
Source: Royal Society of Chemistry journal article supplement (doi:10.1039/d3cp01510f), 2023-01-01
Supplement: d3cp01510f3.csv [file d3cp01510f3.csv]

Name	Density (g cm-3)	Channel (�)	Available Surface Area (cm2 g-1)	Chemical Excess Potential Urea (kJ mol-1)	Chemical Excess Potential TIP5P-E (kJ mol-1)	Selectivity (kJ mol-1)
Zn-DOBDC	1.21946	11.71814	2679.88	-51.96265142	-5.241420703	-46.72123072
CuP-TFPh-COF	0.696146	16.97729	4683.74	-45.40923345	-18.25819496	-27.15103849
ZIF-7	1.24145	2.4037	4691.31	-35.79070822	-5.207414766	-30.58329345
Cu-BTC	0.879097	13.02882	3336.84	-29.42877111	-7.852927003	-21.57584411
CuP-TFPh50-COF	0.682247	17.72714	4727.72	-28.51243998	-11.52393857	-16.98850141
ZIF-77	1.55277	4.83376	4149.54	-24.69895268	-2.698633002	-22.00031968
ZnBDC	1.208	4.95113	3919.48	-24.28522764	-3.724631198	-20.56059644
UIO-66	1.21909	8.45524	3062.01	-23.19845111	-5.544580721	-17.65387039
ZIF-12	1.00576	14.71692	4818.47	-22.70615489	-2.115942519	-20.59021237
ZIF-11	1.00576	14.71692	4818.47	-22.70133253	-1.779134084	-20.92219845
MIL-140B-DFT	1.42971	4.68721	3461.97	-21.95187161	-6.840722413	-15.1111492
ZIF-1	1.2071	2.19402	4405.61	-21.89392018	-2.319803539	-19.57411664
IRMOF-13	0.751941	12.54093	4014.33	-21.76421538	-3.975967499	-17.78824788
ZIF-71	1.15485	17.01643	3864.56	-21.30575881	-1.719029214	-19.5867296
IRMOF-11	0.759904	12.35299	4091.11	-21.14961419	-2.759444597	-18.39016959
ZIF-69-crystal	1.14667	8.15932	4303.29	-20.36747764	-9.946196126	-10.42128151
3D-CuPor-COF	0.331563	16.46047	5231.26	-20.03581582	-3.292996917	-16.7428189
ZIF-2	0.928973	5.28654	4438.76	-19.38205377	-2.865852416	-16.51620135
MIL-140C-DFT	1.17315	6.39832	3730.34	-18.36162622	-2.570233568	-15.79139265
IRMOF-4	0.860171	10.09808	4580.25	-17.40197702	-2.317442246	-15.08453477
IRMOF-9	0.656479	11.11912	4101.42	-17.23543939	-3.619503798	-13.61593559
ZIF-80	1.07643	12.16892	4060.74	-17.18713267	-10.73581565	-6.45131702
ZnMOF-74-VASP	1.17859	11.85881	2755.15	-16.56637881	-3.716266902	-12.85011191
ZnMOF-74	1.17859	11.9185	2745.36	-16.41430825	-3.551666527	-12.86264172
ZnHBDC	0.866753	9.54452	4340.93	-16.35120188	-4.79092934	-11.56027254
MAF-X8	0.954239	7.38412	4553.59	-16.14542023	-4.669397608	-11.47602262
IRMOF-5	0.98065	7.5806	5067.31	-15.80153624	-1.336716013	-14.46482023
ZnBDCdabco	0.82648	9.35491	4372.51	-15.32304194	-3.077454151	-12.24558779
MIL-140D-DFT	1.23247	7.21042	3519.68	-15.0107527	-8.339186958	-6.671565742
CCOF-CuTPP2	0.246683	17.77181	4982	-14.95912021	-2.43914858	-12.51997163
ZIF-6	0.763865	5.73736	4455.47	-14.30061894	-2.07710591	-12.22351303
CCOF-3	0.756286	14.6168	4879.8	-13.28035769	-1.610334932	-11.67002276
JUC-512-1	0.513483	26.24486	5019.78	-13.14408451	-2.247676032	-10.89640848
IRMOF-7	0.709341	10.74021	3783.05	-13.0567832	-2.17357801	-10.88320519
IRMOF-2	0.781195	12.92322	3138.63	-12.33949905	-1.932210687	-10.40728836
CuP-DHNAPh-COF	0.502966	21.59197	4991.09	-12.17986238	-1.675810911	-10.50405147
TAPP-TFPP-COF-AA	0.765031	13.2482	4703.44	-11.58945612	-1.098923886	-10.49053223
ZIF-10	0.746095	12.34505	4424.27	-11.5192825	-1.44941784	-10.06986466
CuP-2-3-DHPh-COF	0.539056	18.84669	4949.01	-11.36970626	-1.802638921	-9.567067339
CuP-PyTTPh-COF	0.70671	14.10409	5030.88	-11.22711413	-1.120549667	-10.10656446
CuP-Ph-COF	0.604593	19.48961	5128.59	-11.00536882	-0.940126969	-10.06524185
IRMOF-1	0.593339	14.93905	3657.79	-10.55896814	-1.640699157	-8.918268983
IRMOF-1-Ar	0.589907	15.0923	3667.92	-10.48513618	-1.616953202	-8.868182978
IRMOF-12	0.380678	19.59315	4061.63	-10.4397395	-1.491580214	-8.948159286
IRMOF-14	0.373402	20.93556	3949.32	-10.22190196	-1.499129698	-8.722772262
IRMOF-8	0.448576	17.91093	3824.65	-10.08720852	-1.483648267	-8.603560253
UMCM-1	0.389889	24.08867	4072.11	-9.783316834	-2.078220041	-7.705096793
IRMOF-15	0.412185	10.39945	4492.83	-9.571881387	-2.281449165	-7.290432222
CuP-BPyPh-COF	0.410524	25.14663	5140.85	-9.080333467	-0.980435229	-8.099898238
IRMOF-10	0.329161	20.87535	4103.58	-8.531499262	-1.144528425	-7.386970837
IRMOF-16	0.205205	25.35431	4477.4	-7.175660106	-0.790729493	-6.384930613
CCOF-4	1.00778	12.13117	4712.53	-7.174338115	0.750611633	-7.924949748
ZIF-97	0.997514	16.36133	4916.17	-16.00066636	-0.955317396	-15.04534896
ZIF-96	0.977341	16.6613	4755.19	-24.00594661	-1.423651484	-22.58229513
ZIF-93	0.991398	16.8743	4810.17	-18.14653244	-1.069598962	-17.07693348
ZIF-90	0.98837	11.00453	4365.18	-13.70239714	-3.413813609	-10.28858353
ZIF-8	0.924526	3.40894	4845.21	-13.4979458	-2.141243269	-11.35670253
ZIF-69	1.14667	8.05687	4375.18	-18.77460297	-11.86665855	-6.90794442
ZIF-68	1.03314	10.85901	4422.33	-19.41456311	-7.8231531	-11.59141001
ZIF-5	1.54336	2.15358	4068.53	17.13616533	-1.27002613	18.40619146
ZIF-4	1.22088	2.45854	4422.25	-26.18490404	-2.992381108	-23.19252293
ZIF-3	0.880009	5.69683	4391.71	-19.55865183	-2.358166226	-17.2004856
IRMOF-3	0.634332	14.97987	3629.84	-11.75191969	-1.812242065	-9.939677625
PCN-68	0.0982298	41.37105	3932.08	-13.24768206	-1.34992761	-11.89775445
PCN-61	0.560742	18.71723	3961.2	-16.97844097	-2.349984847	-14.62845612
PCN-60	0.562613	18.45826	3983.99	-15.6547869	-2.203177309	-13.45160959
MOF-200	0.214979	17.55422	4645.25	-30.33753612	-6.961855052	-23.37568107
