# Supplementary material for: In silico screening of nanoporous materials for urea removal in hemodialysis applications
Source: Royal Society of Chemistry journal article supplement (doi:10.1039/d3cp01510f), 2023-01-01
Supplement: d3cp01510f5.csv [file d3cp01510f5.csv]

Name	Density (g cm-3)	Channel (�)	Available Surface Area (cm2 g-1)	Chemical Excess Potential Urea (kJ mol-1)	Chemical Excess Potential TIP5P-E (kJ mol-1)	Selectivity (kJ mol-1)
IZA.PTY	1.70	4.67	2410	-74.33	-24.19	-50.14
IZA.SFS	1.66	6.76	2540	-71.49	-19.28	-52.21
IZA.MOR	1.69	6.20	2622	-69.72	-21.86	-47.87
IZA.EON	1.68	7.27	2548	-67.13	-21.04	-46.09
IZA.MTW	1.82	5.31	2583	-65.26	-19.96	-45.29
IZA.MFI	1.84	5.94	2502	-64.83	-18.10	-46.73
IZA.TON	1.81	5.04	2680	-61.20	-16.07	-45.13
IZA.FAU	1.33	10.70	2462	-60.43	-12.95	-47.48
IZA.MTT	1.82	5.48	2656	-60.37	-16.07	-44.31
IZA.ESV	1.77	5.65	2543	-60.02	-16.74	-43.29
IZA.EUO	1.71	6.19	2633	-57.89	-16.13	-41.76
IZA.MEI	1.67	7.66	2185	-56.91	-16.60	-40.30
IZA.FER	1.75	5.14	2637	-56.38	-12.79	-43.60
IZA.NES	1.64	6.17	2637	-55.93	-15.35	-40.58
IZA.MEL	1.73	6.86	2583	-54.88	-13.18	-41.70
IZA.MSE	1.63	6.49	2450	-54.69	-14.50	-40.20
IZA.IWV	1.50	8.11	2571	-54.60	-15.49	-39.10
IZA.ERI	1.68	6.30	2435	-53.00	-13.27	-39.73
IZA.MSO	1.87	6.83	2415	-51.61	-13.95	-37.67
IZA.ITE	1.57	7.77	2618	-50.79	-14.62	-36.17
IZA.NSI	1.87	3.46	2686	-49.63	-17.27	-32.36
IZA.MON	1.76	3.76	2536	-44.03	-16.22	-27.81
IZA.VFI	1.57	11.17	2275	-31.98	-9.17	-22.80
IZA.AHT	1.92	3.40	2458	-30.76	-24.67	-6.09
IZA.LTJ	1.85	3.63	2498	-30.16	-12.19	-17.96
IZA.MVY	2.09	3.00	2453	29.53	-22.39	51.93
